# Supplementary material
Source: publisher figshare collection journal article supplement (https://sage.figshare.com/ndownloader/files/23425712)
Supplement: Supplementary file 1 [file 23425712]

**Supplemental Table 1 – Institutional vancomycin dosing**

|                                                                                                                                                                                                         | <b>Creatinine Clearance<br/>&gt; 50 ml/min</b>                                                                                                                                                                                                                                                                                                                        | <b>Creatinine Clearance<br/>20-50 ml/min</b> |
|---------------------------------------------------------------------------------------------------------------------------------------------------------------------------------------------------------|-----------------------------------------------------------------------------------------------------------------------------------------------------------------------------------------------------------------------------------------------------------------------------------------------------------------------------------------------------------------------|----------------------------------------------|
| <b>Loading Dose</b> <ul style="list-style-type: none"> <li>A loading dose may be considered in critically ill/sepsis</li> </ul>                                                                         | <b>25 mg/kg x 1</b>                                                                                                                                                                                                                                                                                                                                                   | <b>25 mg/kg x 1</b>                          |
| <b>Maintenance Dose</b>                                                                                                                                                                                 | <b>15mg/kg q12h*</b><br>(unless age >65, consider Q24h)<br><br><small>*15mg/kg q8h may be considered in:<br/>           Age &lt; 30, Obesity, or disease states<br/>           with rapid drug clearance</small>                                                                                                                                                      | <b>15mg/kg q24h</b>                          |
| <b>Monitoring</b> <ul style="list-style-type: none"> <li>Goal trough:<br/>               10-20 mcg/mL<br/>               15-20 mcg/mL can be considered for severe infections caused by MRSA</li> </ul> | Obtain trough level, prior to 4th dose in the following patient populations: <ul style="list-style-type: none"> <li>Rapidly changing renal function</li> <li>Obese or underweight</li> <li>Duration &gt; 7 days</li> <li>Expected duration &gt; 3 days</li> <li>&gt;4g/day of vancomycin</li> <li>Concomitant nephrotoxic drugs</li> <li>Neutropenic fever</li> </ul> |                                              |

MRSA= methicillin-resistant *staphylococcus aureus*
